# Supplementary material for: Is the Removal of Nettles along Ditches Effective in Controlling Bois Noir in Vineyards?
Source: MDPI journal article supplement (doi:10.3390/agronomy14040643), 2024-03-22
Supplement: s1 [file s1]

Archive with 1 entries (1 files):
- agronomy-2893005-supplementary.pdf
