# Supplementary material for: Is the Removal of Nettles along Ditches Effective in Controlling Bois Noir in Vineyards?
Source: MDPI journal article supplement (doi:10.3390/agronomy14040643), 2024-03-22
Supplement: s1 [file s1 › agronomy-2893005-supplementary.pdf]

**Table S1.** Statistical analyses on the influence of the sampling year on the accumulated captures recorded along the ditch and within the vineyard over the entire sampling period (total captures) and in the two monthly subperiods. Fr = Friedman Statistic Fr; The two subscript numbers refer to the number of columns (years) and rows (traps), respectively.

| <b>Vineyard and period of captures</b> | <b>Along ditch</b>                     | <b>Within vineyard</b>                  |
|----------------------------------------|----------------------------------------|-----------------------------------------|
| Vineyard A                             |                                        |                                         |
| Total captures                         | Fr <sub>7,7</sub> = 34.826; P < 0.0001 | Fr <sub>7,28</sub> = 78.881; P < 0.0001 |
| Only June                              | Fr <sub>7,7</sub> = 17.137; P = 0.0088 | Fr <sub>7,28</sub> = 62.748; P < 0.0001 |
| Only July                              | Fr <sub>7,7</sub> = 35.611; P < 0.0001 | Fr <sub>7,28</sub> = 64.396; P < 0.0001 |
| Vineyard B                             |                                        |                                         |
| Total captures                         | Fr <sub>7,7</sub> = 32.653; P < 0.0001 | Fr <sub>7,21</sub> = 42.447; P < 0.0001 |
| Only June                              | Fr <sub>7,7</sub> = 12.606; P = 0.0498 | Fr <sub>7,21</sub> = 29.479; P < 0.0001 |
| Only July                              | Fr <sub>7,7</sub> = 27.546; P < 0.0001 | Fr <sub>7,21</sub> = 54.190; P < 0.0001 |
